# Supplementary material for: Organosilicon-mediated total synthesis of the triquinane sesquiterpenes (±)-β-isocomene and (±)-isocomene
Source: Royal Society of Chemistry journal article supplement (doi:10.1039/c0ob00051e), 2010-01-01
Supplement: c0ob00051e.pdf [file c0ob00051e.pdf]

mgINVGSTP, HSQC 1h 43min

AS-295-2 in CDCl<sub>3</sub>

NAME AS295-2  
EXPNO 14  
PROCNO 1

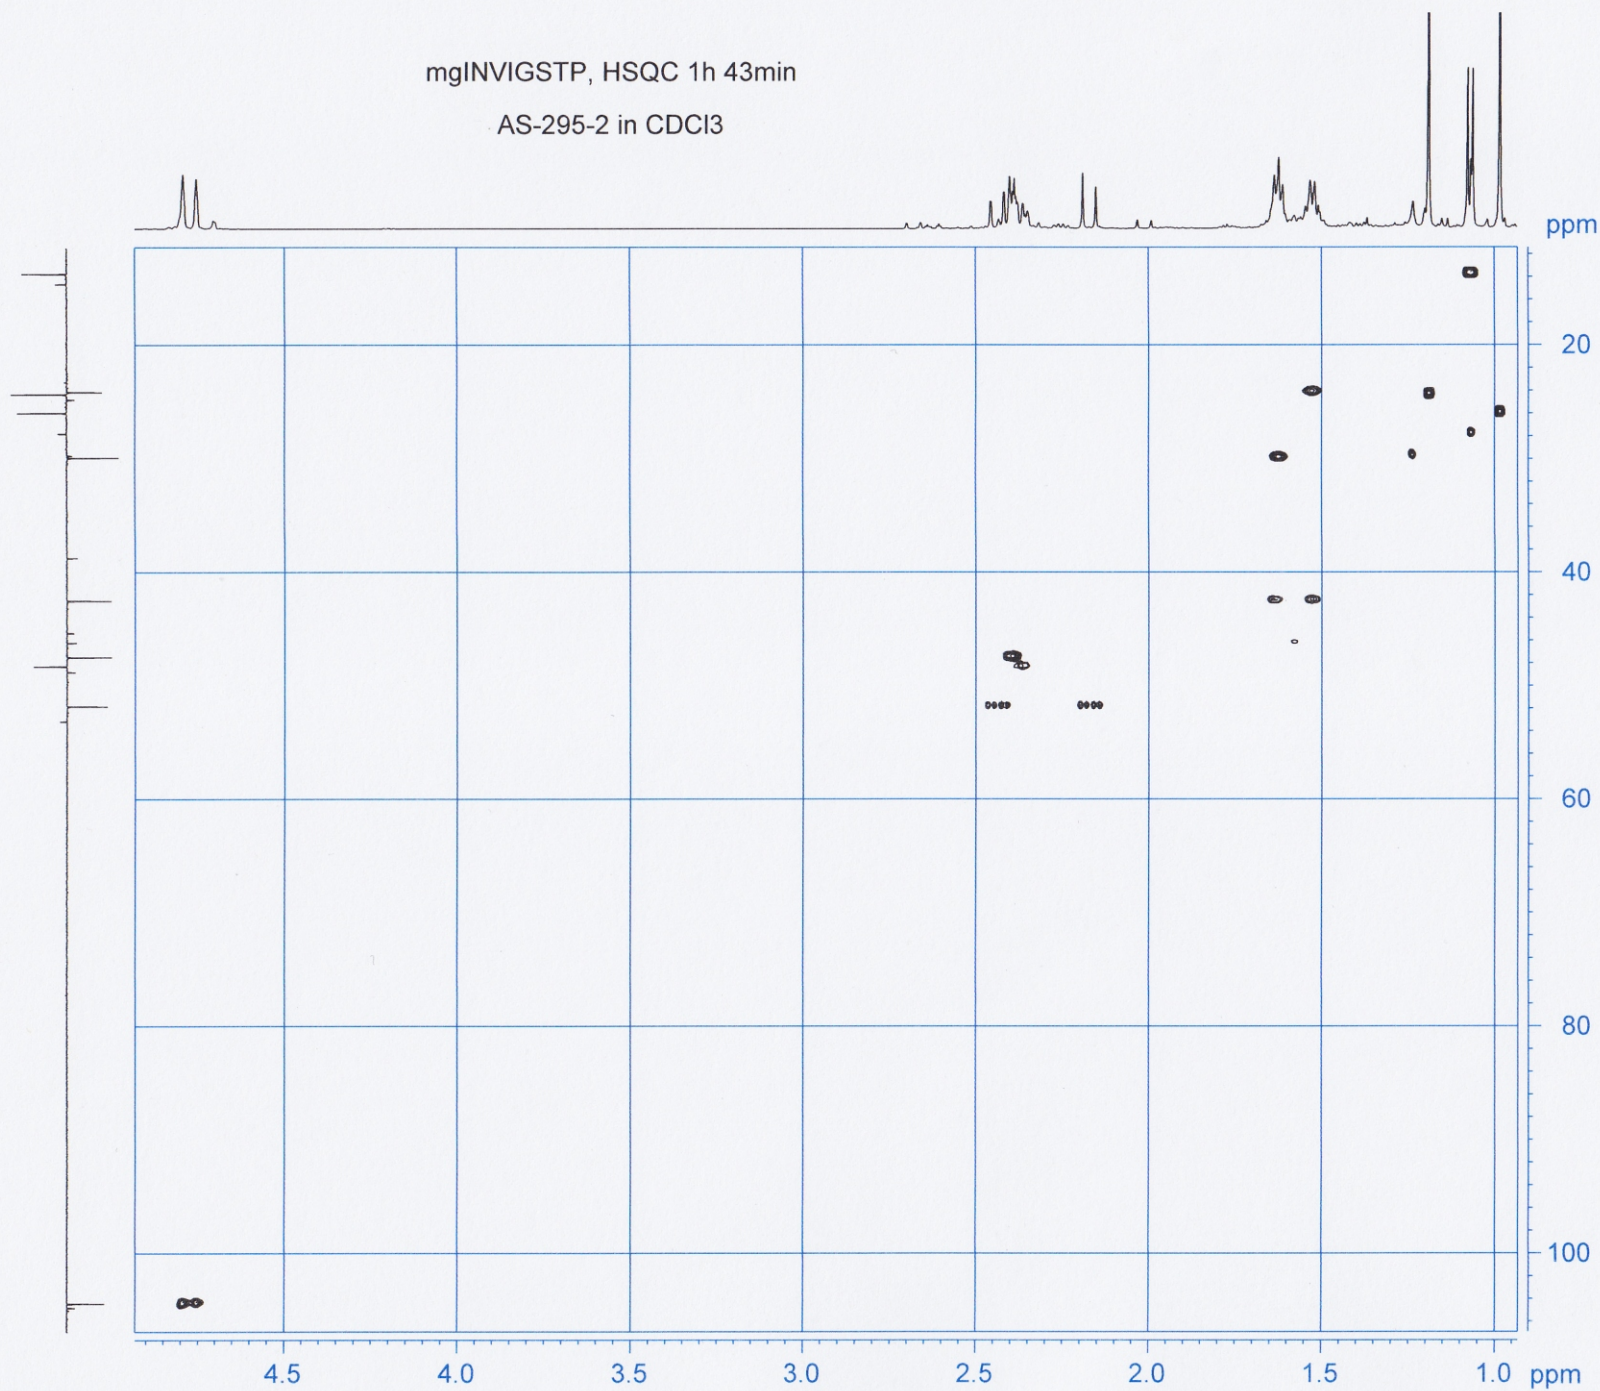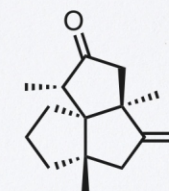

18

HSQC



mgINV4GSLPLRND , HMBC 4h 43min  
AS 295-2 in CDCl<sub>3</sub>

NAME AS2952  
EXPNO 15  
PROCNO 1

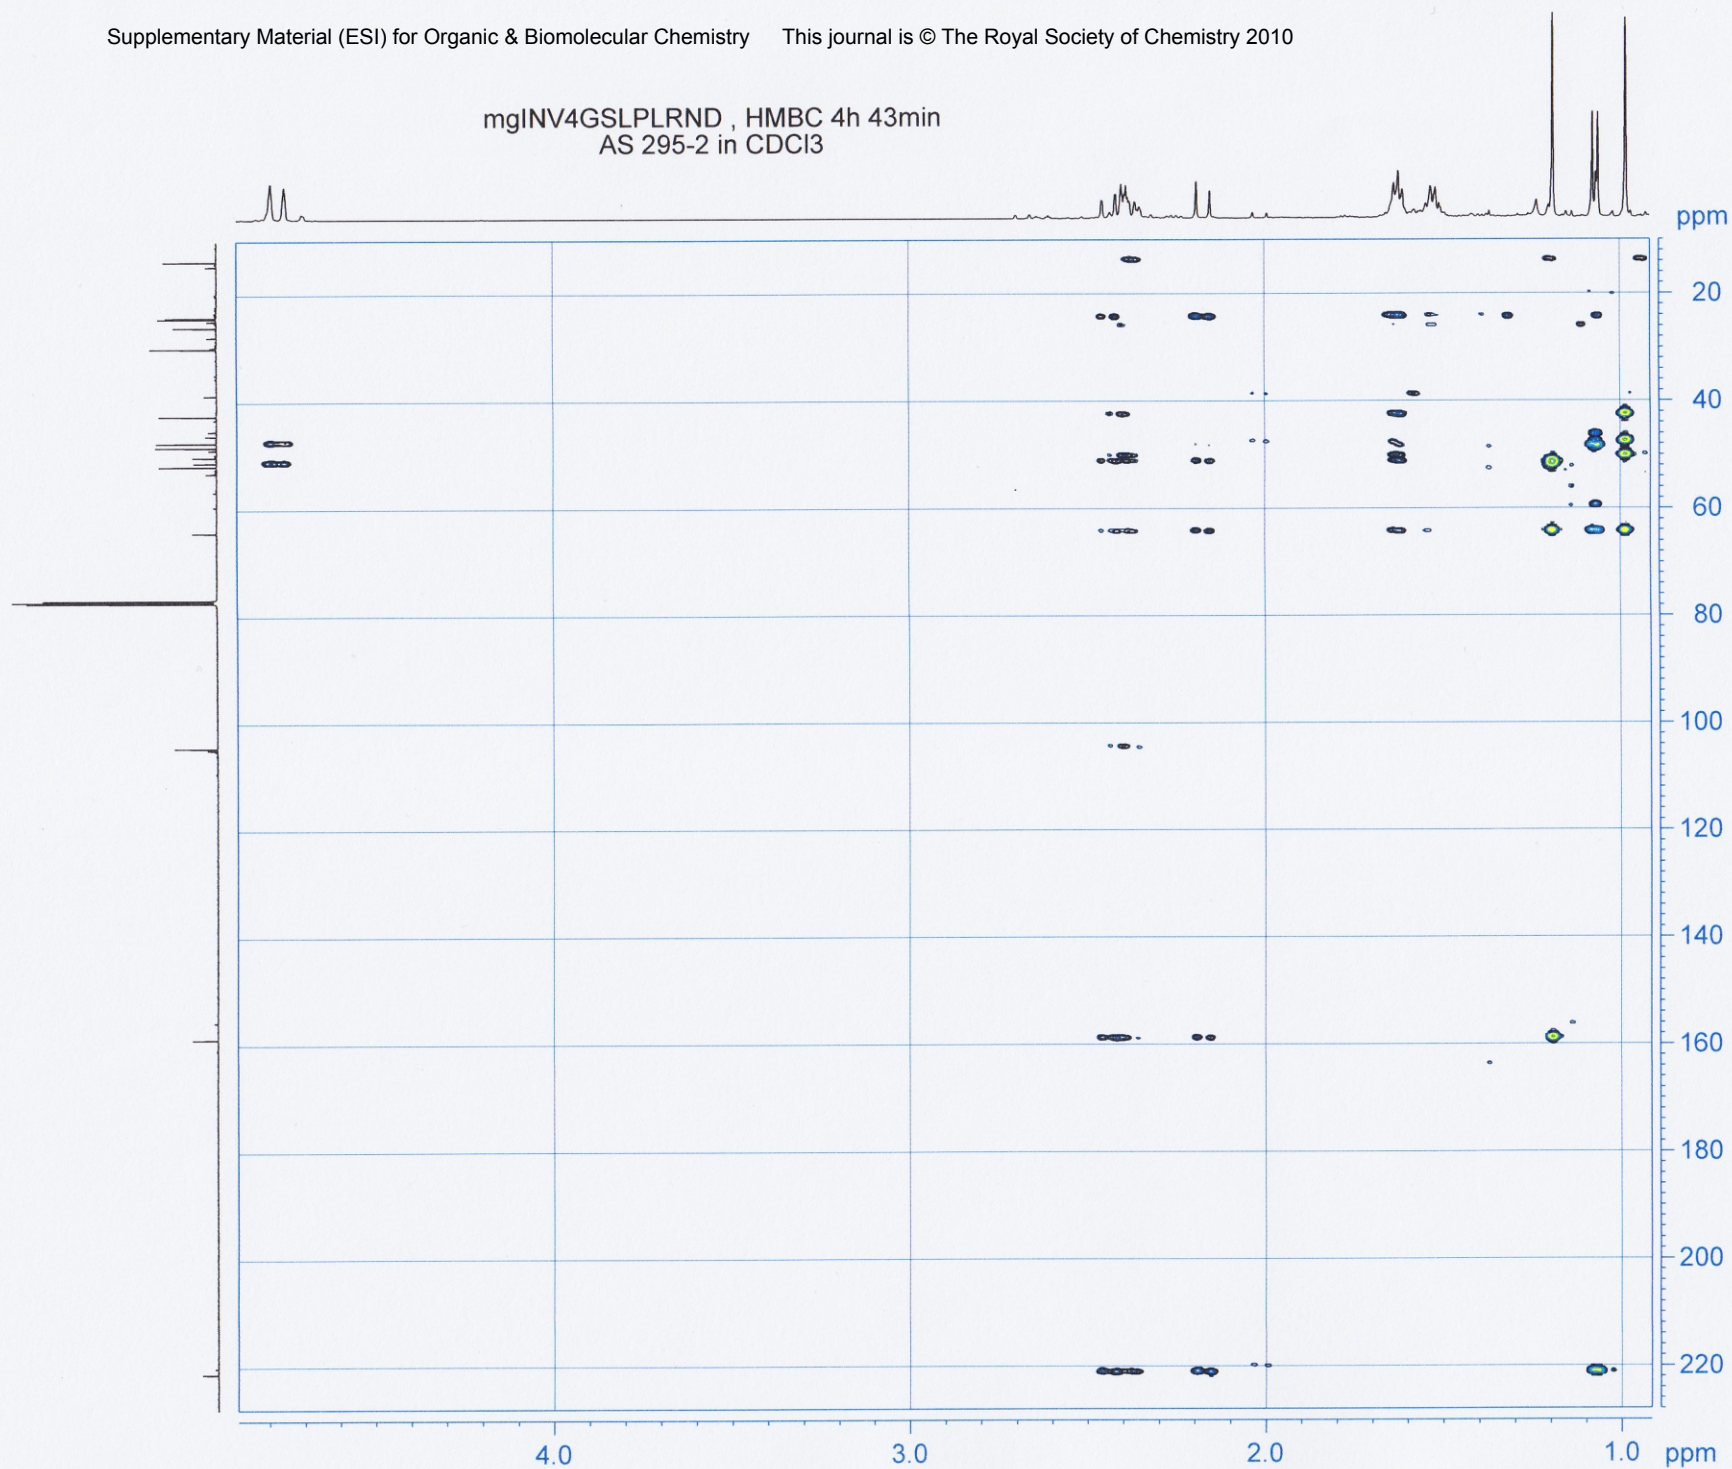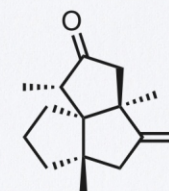

**18**

HMBC



mgINV4GSLPLRND , HMBC 4h 43min  
AS 295-2 in CDCl<sub>3</sub>

NAME AS2952  
EXPNO 15  
PROCNO 1

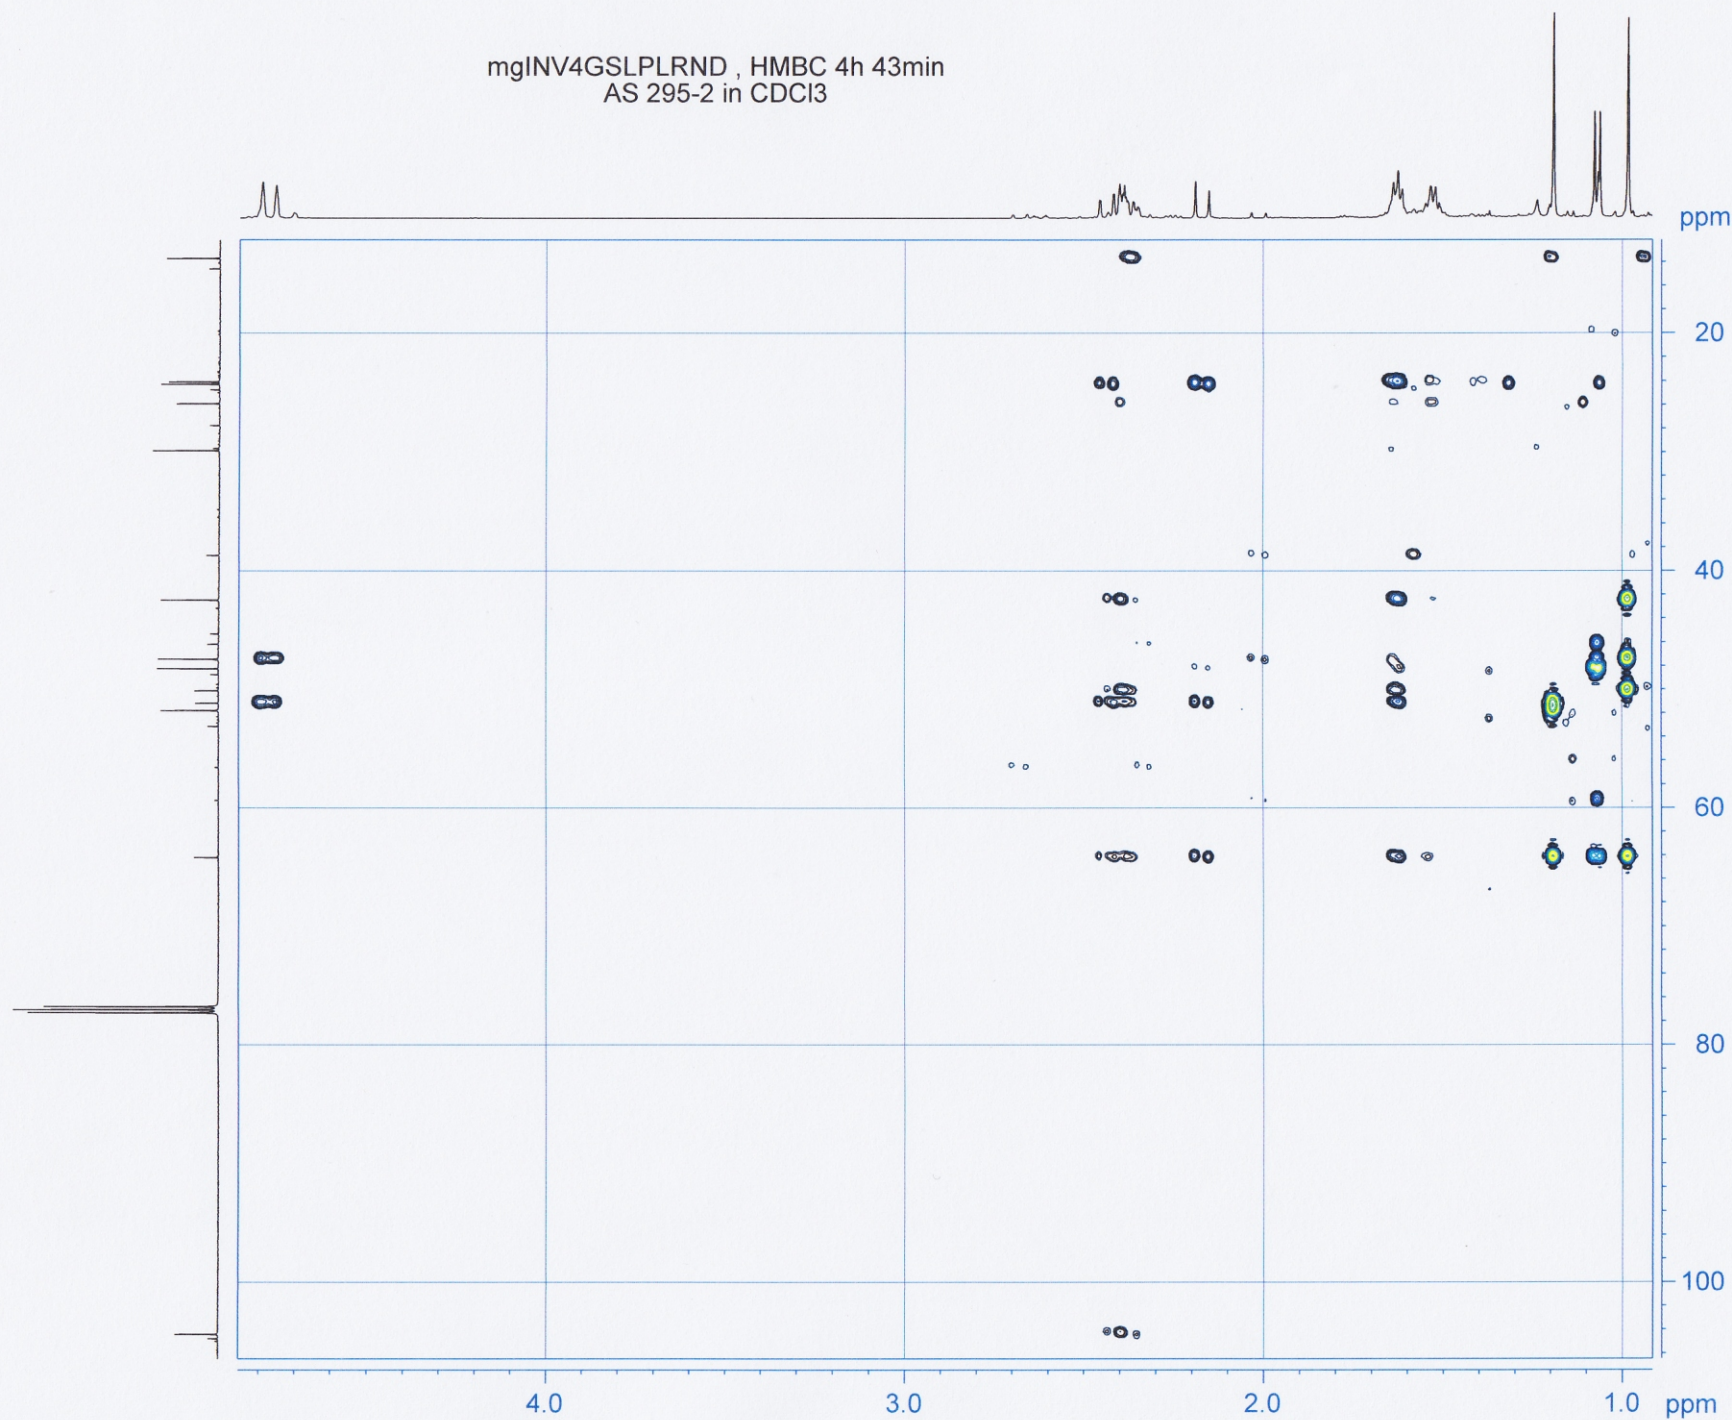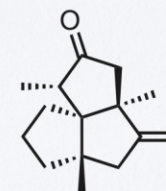

**18**  
HMBC



NAME AS2952  
EXPNO 16  
PROCNO 1

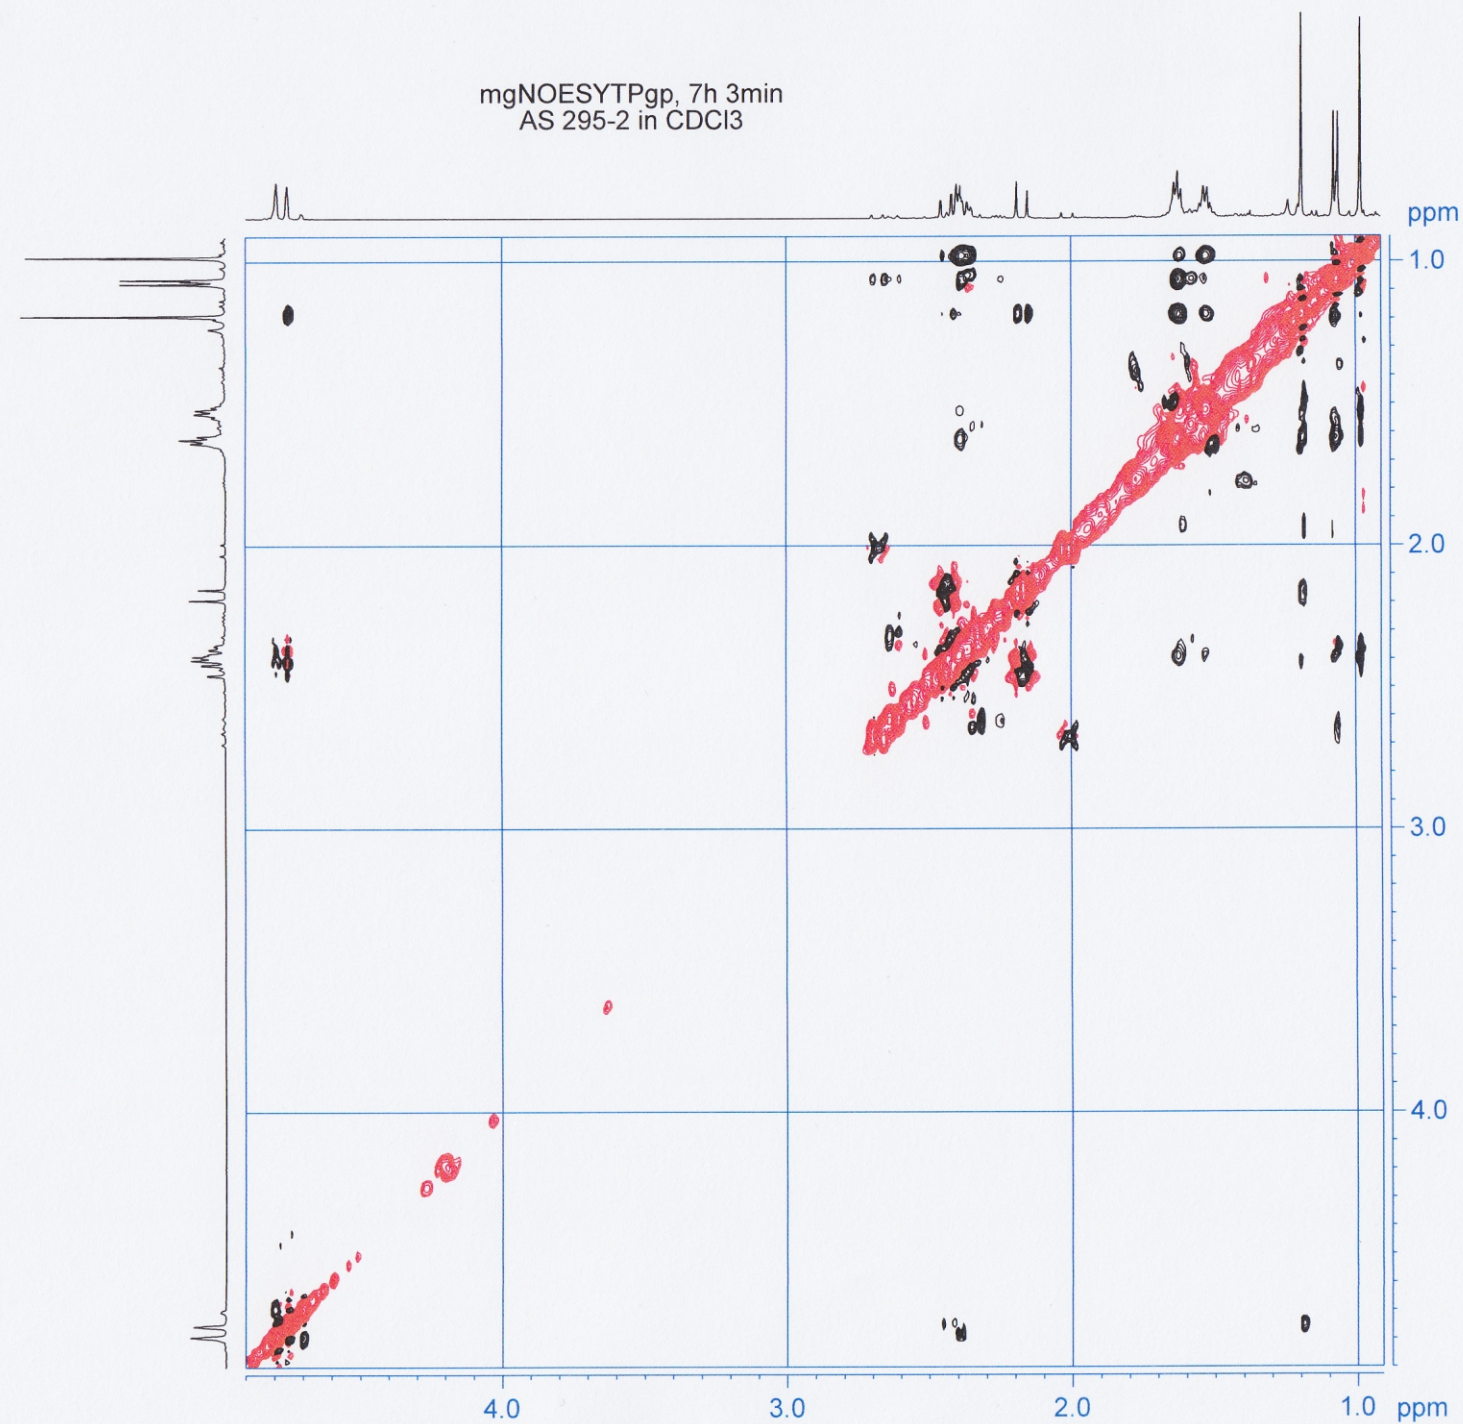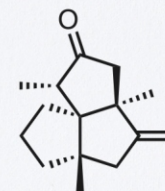

18

NOESY



mgNOESYTPgp, 7h 3min  
AS 295-2 in CDCl<sub>3</sub>

|        |        |
|--------|--------|
| NAME   | AS2952 |
| EXPNO  | 16     |
| PROCNO | 1      |

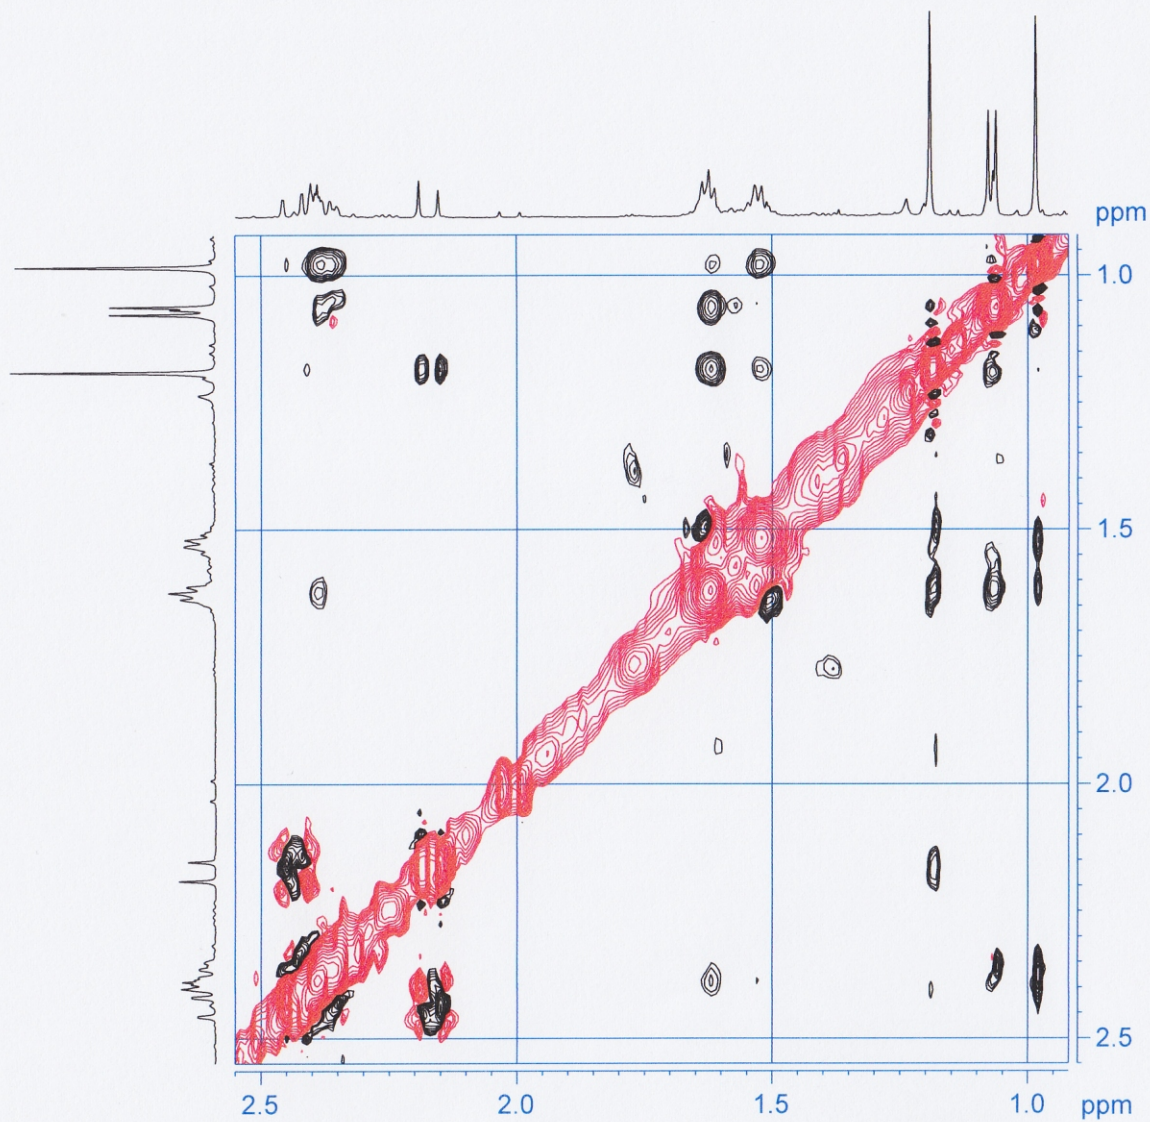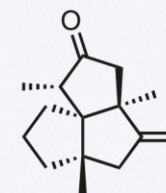

**18**  
NOESY
